# Supplementary material for: Overexpression of Mutant FKRP Restores Functional Glycosylation and Improves Dystrophic Phenotype in FKRP Mutant Mice
Source: PubMed Central journal article supplement — Mol Ther Nucleic Acids. 2018 Mar 6;11:216–27. doi: 10.1016/j.omtn.2018.02.008 (PMC5992437; doi:10.1016/j.omtn.2018.02.008), 2018-03-06
Supplement: mmc1.pdf [file mmc1.pdf]

OMTN, Volume 11

## **Supplemental Information**

### **Overexpression of Mutant FKRP Restores Functional Glycosylation and Improves Dystrophic Phenotype in FKRP Mutant Mice**

**Jason D. Tucker, Pei J. Lu, Xiao Xiao, and Qi L. Lu**

## SUPPLEMENTAL INFORMATION

### Overexpression of Mutant FKRP Associated with CMD Restores Functional Glycosylation and Improves Dystrophic Phenotype in Skeletal and Cardiac Muscle of FKRP mutant Mice

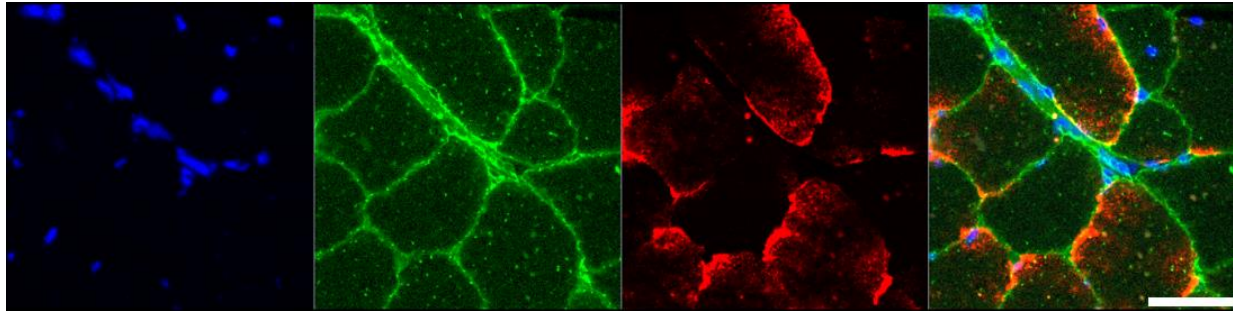

**SI Figure 1.** Localization of GM130 (green as a Golgi marker presenting as points within the cytoplasm and along fiber membrane) and mhFKRP (red) in *P448Lneo<sup>-</sup>* TA muscles 1 month after AAV9-*mhFKRP* 5e13 vg/kg treatment by confocal microscopy. No consistent co-localization of the two signals was observed. Scale Bars = 50  $\mu$ m

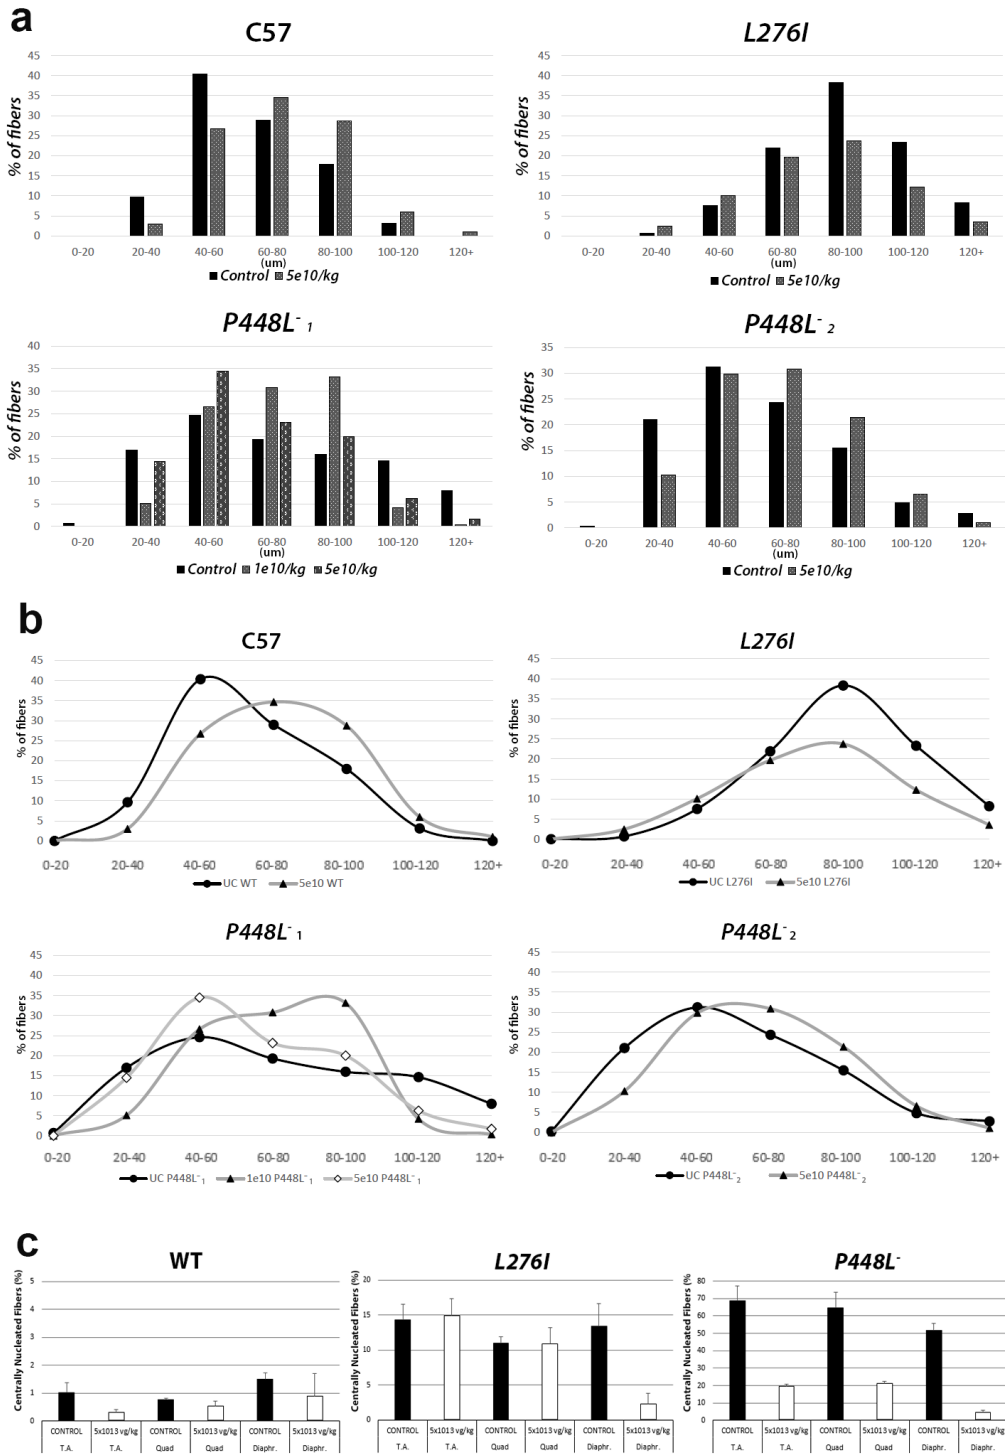

**SI Figure 2.** (A) Morphometric distribution of skeletal muscle fiber diameters ( $\mu\text{m}$ ) in treated and control *C57BL/6*, *L276I* and *FKRP* mutant mice one month after AAV9-*mhFKRP* administration. (B) Line representation of the same data, more clearly demonstrating shifts in distribution patterns. (C) Centrally nucleated fibers of the TA, quadriceps, and diaphragm of control and treated *C57BL/6*, *P448L* and *L276I* mutant mice after one-month treatment with AAV9-*mhFKRP*. Error bars represent the standard error of the mean (SEM).

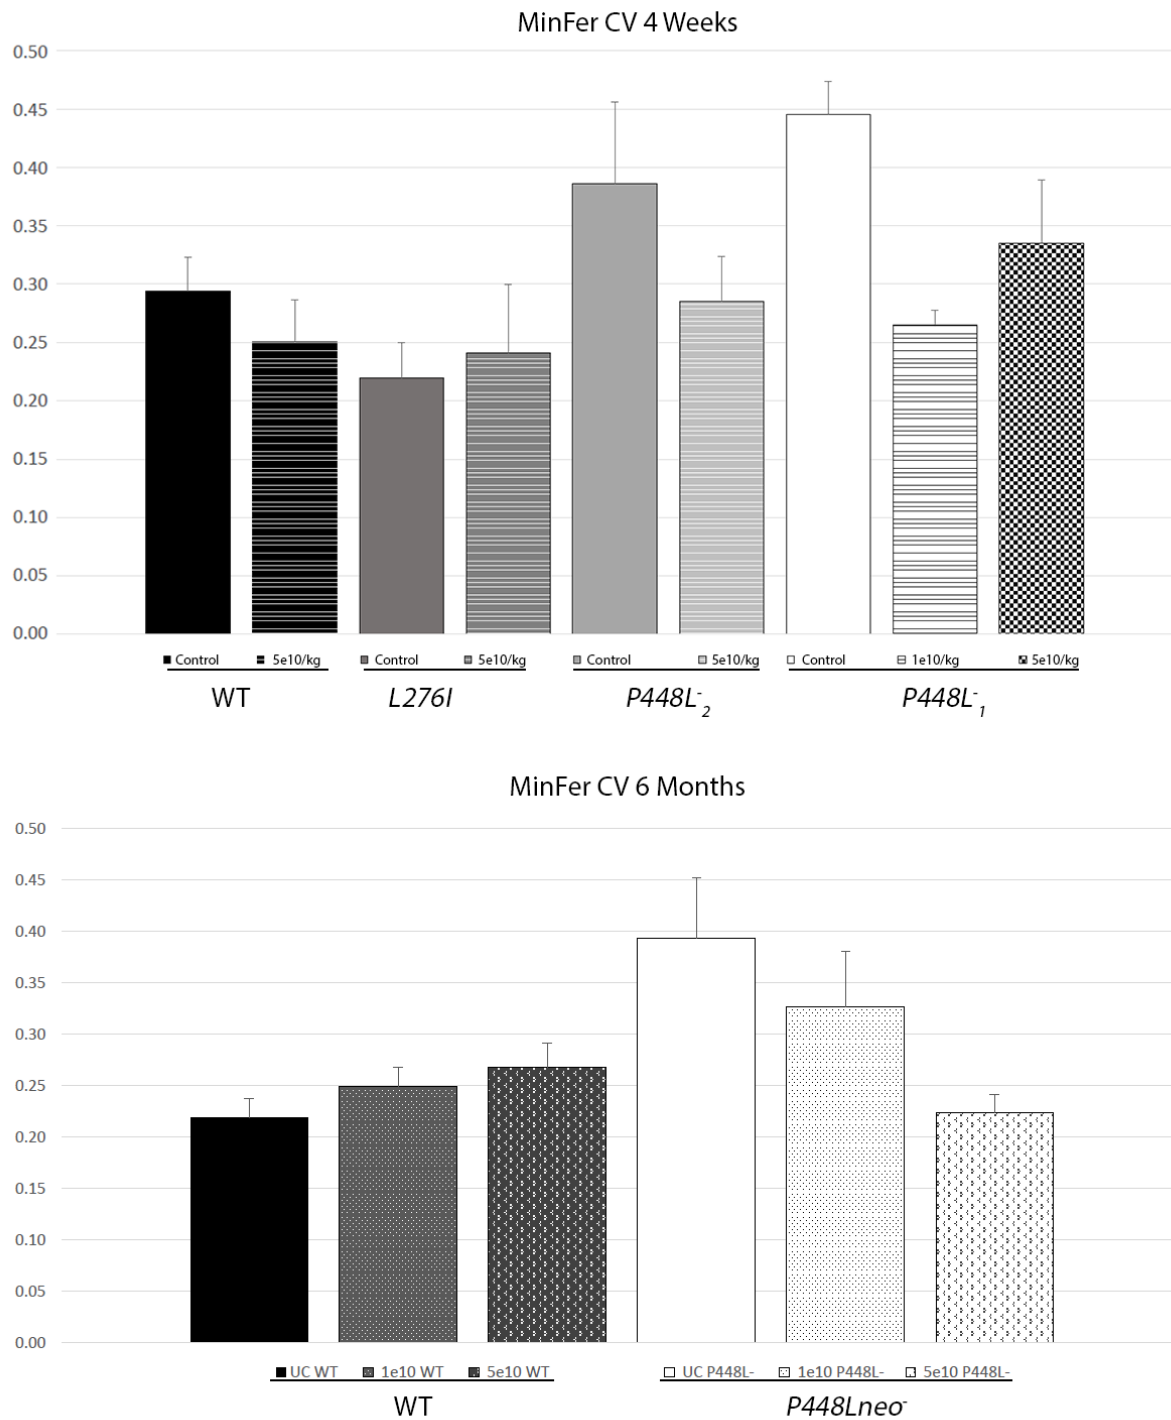

**SI Figure 3.** Coefficient of variance (CV) calculated from morphometric measures ‘MinFer’ (ImageJ) in *C57BL/6* (WT) and *FKRP* mutant mice one month after AAV9-*mhFKRP* treatment. Reduction in the CV, indicating a more homogenous muscle fiber composition can be observed as early as one month after AAV9-*mhFKRP* administration in all treated groups, with the exception of the WT and *L276I* groups which were relatively unchanged. At six months, both 1e13 vg/kg and 5e13 vg/kg treated *P448Lneo<sup>-</sup>* cohorts demonstrated reduced CV in fiber sizes with variance more closely resembling WT.
